# Supplementary material
Source: publisher figshare collection journal article supplement (https://rs.figshare.com/ndownloader/files/21305115)
Supplement: Supplementary file 1 [file 21305115]

## Sheet: Fig2
position	calcification	sem
14	0.279042	0.0193369
13	0.338309	0.0122798
12	0.376995	0.0108774
11	0.399055	0.00999617
10	0.40766	0.00899089
9	0.421577	0.011137
8	0.403695	0.0112197
7	0.37777	0.0106658
6	0.379706	0.013739
5	0.338577	0.0173619
4	0.298765	0.0186051
3	0.253438	0.014754
2	0.251938	0.0184677
1	0.216296	0.0236729

## Sheet: Fig3
	calcification	family	lifestyle
Amatitlania_nigrofasciata	0.273784	Cichlidae	aquatic
Ambloplites_rupestris	0	Centrarchidae	aquatic
Anablepsoides_hartii	0.441607	Rivulidae	amphibious
Aphyolebias_rubrocaudatus	0.343025	Nothobranchiidae	aquatic
Aphyosemion_australe	0.274562	Nothobranchiidae	aquatic
Aphyosemion_bivittatum	0.225329	Nothobranchiidae	aquatic
Aphyosemion_fulgens	0.337896	Nothobranchiidae	amphibious
Aphyosemion_gabunense	0.334377	Nothobranchiidae	amphibious
Aphyosemion_primigenium	0.203317	Nothobranchiidae	amphibious
Aphyosemion_striatum	0.405074	Nothobranchiidae	amphibious
Aplocheilus_lineatus	0.41019	Aplocheilidae	amphibious
Ataeniobius_toweri	0.421616	Goodeidae	aquatic
Austrofundulus_leohoignei	0.312927	Rivulidae	aquatic
Austrofundulus_limnaeus	0.331905	Rivulidae	aquatic
Chapalichthys_pardalis	0.332754	Goodeidae	aquatic
Cynodonichthys_hildebrandi	0.508593	Rivulidae	amphibious
Cynodonichthys_tenuis	0.437673	Rivulidae	amphibious
Cynolebias_itapicuruensis	0.247352	Rivulidae	aquatic
Cyprinodon_albivelis	0.49595	Cyprinodontidae	aquatic
Cyprinodon_nazas	0.576744	Cyprinodontidae	aquatic
Cyprinodon_tularosa	0.536656	Cyprinodontidae	aquatic
Danio_rerio	0	Cyprinidae	aquatic
Dermogenys_pusilla	0.369381	Zenarchopteridae	aquatic
Epiplatys_chaperi	0.379346	Nothobranchiidae	aquatic
Epiplatys_dageti	0.681395	Nothobranchiidae	aquatic
Epiplatys_togolensis	0.426128	Nothobranchiidae	aquatic
Floridichthys_polyommus	0.340844	Cyprinodontidae	aquatic
Fundulopanchax_gardneri	0.296067	Nothobranchiidae	amphibious
Fundulopanchax_gresensi	0.335071	Nothobranchiidae	aquatic
Fundulopanchax_walkeri	0.34802	Nothobranchiidae	amphibious
Fundulus_confluentus	0.374731	Fundulidae	amphibious
Fundulus_grandis	0.203637	Fundulidae	amphibious
Fundulus_heteroclitus	0.431588	Fundulidae	amphibious
Fundulus_rathbuni	0.345982	Fundulidae	aquatic
Fundulus_similis	0.280601	Fundulidae	amphibious
Gambusia_affinis	0.360633	Poeciliidae	aquatic
Girardinus_microdactylus	0.513345	Cyprinodontidae	aquatic
Gnatholebias_zonatus	0.335661	Rivulidae	aquatic
Goodea_gracilis	0.291917	Goodeidae	aquatic
Heterandria_formosa	0.4335	Poeciliidae	aquatic
Hypsolebias_antenori	0.37679	Rivulidae	aquatic
Hypsolebias_sertanejo	0.298513	Rivulidae	aquatic
Ilyodon_furcidens	0.427377	Goodeidae	aquatic
Ilyodon_whitei	0.306274	Goodeidae	aquatic
Ilyodon_xantusi	0.344667	Goodeidae	aquatic
Jenynsia_onca	0.312949	Anablebidae	aquatic
Jordanella_floridae	0.442118	Cyprinodontidae	amphibious
Kryptolebias_marmoratus	0.428993	Rivulidae	amphibious
Laimosemion_xiphidius	0.389598	Rivulidae	amphibious
Limia_nigrofasciata	0.384158	Poeciliidae	aquatic
Limia_perugiae	0.573018	Poeciliidae	aquatic
Lucania_goodei	0.325255	Fundulidae	aquatic
Lucania_parva	0.304313	Fundulidae	aquatic
Melanotaenia_splendida	0.265752	Melanotaeniidae	aquatic
Menidia_menidia	0.412543	Atherinopsidae	aquatic
Poecilia_parae	0.412328	Poeciliidae	aquatic
Nematolebias_papilliferus	0.353318	Rivulidae	aquatic
Nothobranchius_brieni	0.22203	Nothobranchiidae	aquatic
Nothobranchius_cardinalis	0.186578	Nothobranchiidae	aquatic
Nothobranchius_furzeri	0.382573	Nothobranchiidae	aquatic
Nothobranchius_fuscotaeniatus	0.343293	Nothobranchiidae	aquatic
Nothobranchius_hassoni	0.350974	Nothobranchiidae	aquatic
Nothobranchius_jubbi	0.296021	Nothobranchiidae	aquatic
Nothobranchius_kadleci	0.261324	Nothobranchiidae	aquatic
Nothobranchius_kafuensis	0.197085	Nothobranchiidae	aquatic
Nothobranchius_kilomberoensis	0.267761	Nothobranchiidae	aquatic
Nothobranchius_milvertzi	0.252243	Nothobranchiidae	aquatic
Nothobranchius_polli	0.202252	Nothobranchiidae	aquatic
Nothobranchius_rachovii	0.269839	Nothobranchiidae	aquatic
Nothobranchius_rubroreticulatus	0.269965	Nothobranchiidae	aquatic
Nothobranchius_wattersi	0.173489	Nothobranchiidae	aquatic
Oncorhynchus_mykiss	0	Salmonidae	aquatic
Oryzias_dancena	0.541749	Adrianichthyidae	aquatic
Oryzias_woworae	0.456119	Adrianichthyidae	aquatic
Oxyeleotris_marmorata	0.325303	Eleotridae	amphibious
Pelvicachromis_pulcher	0.262094	Cichlidae	aquatic
Poecilia_gillii	0.563047	Poeciliidae	aquatic
Poecilia_latipinna	0.692264	Poeciliidae	aquatic
Poecilia_mexicana	0.582679	Poeciliidae	aquatic
Poecilia_reticulata	0.477601	Poeciliidae	aquatic
Poecilia_sphenops	0.675877	Poeciliidae	aquatic
Poecilia_wingei	0.463702	Poeciliidae	aquatic
Poeciliopsis_prolifica	0.472831	Poeciliidae	aquatic
Poeciliopsis_retropinna	0.374077	Poeciliidae	aquatic
Poeciliopsis_turneri	0.550561	Poeciliidae	aquatic
Poeciliopsis_gracilis	0.455577	Poeciliidae	aquatic
Poeciliopsis_infans	0.477282	Poeciliidae	aquatic
Poropanchax_normani	0.437421	Poeciliidae	aquatic
Pterolebias_longipinnis	0.527583	Rivulidae	aquatic
Rachovia_brevis	0.0454309	Rivulidae	aquatic
Rivulus_cylindraceus	0.385366	Rivulidae	amphibious
Simpsonichthys_margaritatus	0.254762	Rivulidae	aquatic
Simpsonichthys_suzarti	0.326272	Rivulidae	aquatic
Skiffia_lermae	0.53703	Goodeidae	aquatic
Xenotoca_eiseni	0.411269	Goodeidae	aquatic
Xiphophorus_alvarezi	0.366867	Poeciliidae	aquatic
Xiphophorus_hellerii	0.3719	Poeciliidae	aquatic
Xiphophorus_maculatus	0.403773	Poeciliidae	aquatic
Xiphophorus_mayae	0.34646	Poeciliidae	aquatic
Xiphophorus_nezahualcoyotl	0.387417	Poeciliidae	aquatic
Gambusia_yucatana	0.431409	Poeciliidae	aquatic
Poecilia_orri	0.554299	Poeciliidae	aquatic
Strongylura_notata	0.145908	Belonidae	aquatic
Ameca_splendens	0.488639	Goodeidae	aquatic
Aplocheilus_panchax	0.523731	Aplocheilidae	amphibious
Aphyosemion_celiae	0.300553	Nothobranchiidae	aquatic

## Sheet: Figs4A +S1A
Species	Treatment	Normalized_fluorescence	calcification
Kryptolebias marmoratus	water	0.71155	0.398697
Kryptolebias marmoratus	water	0.456939	0.388468
Kryptolebias marmoratus	water	0.937557	0.375145
Kryptolebias marmoratus	water	2.84458	0.365317
Kryptolebias marmoratus	water	0.450673	0.382358
Kryptolebias marmoratus	water	0.717371	0.34717
Kryptolebias marmoratus	water	0.917749	0.402923
Kryptolebias marmoratus	water	0.766162
Kryptolebias marmoratus	water	3.86868	0.403248
Kryptolebias marmoratus	water	1.08054	0.41305
Kryptolebias marmoratus	water	0.888355	0.415194
Kryptolebias marmoratus	water	0.879329	0.438715
Kryptolebias marmoratus	water	0.535118	0.377733
Kryptolebias marmoratus	water	0.42645	0.374397
Kryptolebias marmoratus	water	0.694011	0.403317
Kryptolebias marmoratus	water	0.437954	0.395323
Kryptolebias marmoratus	water	0.386986	0.367844
Kryptolebias marmoratus	air	2.06143	0.408688
Kryptolebias marmoratus	air	0.994909	0.397471
Kryptolebias marmoratus	air	3.21004	0.423177
Kryptolebias marmoratus	air	1.49588	0.422815
Kryptolebias marmoratus	air	4.92791	0.404048
Kryptolebias marmoratus	air	0.817635	0.400851
Kryptolebias marmoratus	air		0.326974
Kryptolebias marmoratus	air	4.96026	0.428023
Kryptolebias marmoratus	air	1.94077	0.376318
Kryptolebias marmoratus	air	1.24769	0.418751
Kryptolebias marmoratus	air	4.22662	0.410641
Kryptolebias marmoratus	air	4.13651	0.433401
Kryptolebias marmoratus	air	0.432148	0.397735
Kryptolebias marmoratus	air	1.25592	0.377787
Kryptolebias marmoratus	air	1.26773	0.433904
Kryptolebias marmoratus	air	1.41747	0.402887
Kryptolebias marmoratus	air	0.586079	0.427712
Kryptolebias marmoratus	air	1.89383	0.440151

## Sheet: Figs4B+S1B
Species	Treatment	Normalized_fluorescence	calcification
Kmar	normoxia	0.995234	0.388987
Kmar	normoxia	0.694907	0.440774
Kmar	normoxia	1.36433	0.394277
Kmar	normoxia	1.6456	0.417917
Kmar	normoxia	1.10159	0.383191
Kmar	normoxia	1.2452	0.39401
Kmar	normoxia	1.22202	0.390535
Kmar	normoxia	0.801265	0.390361
Kmar	normoxia	1.12188	0.34625
Kmar	normoxia	0.826495	0.323059
Kmar	normoxia	0.569842	0.345951
Kmar	normoxia	0.87288	0.343521
Kmar	normoxia	0.575108	0.357316
Kmar	normoxia	0.298376	0.320548
Kmar	normoxia	1.48533	0.410756
Kmar	normoxia	1.17995	0.320865
Kmar	hypoxia	1.17494	0.387
Kmar	hypoxia	0.718759	0.406985
Kmar	hypoxia	1.3322	0.397958
Kmar	hypoxia	1.80702	0.38405
Kmar	hypoxia	0.87391	0.398531
Kmar	hypoxia	1.16606	0.412191
Kmar	hypoxia	1.17565	0.429254
Kmar	hypoxia	0.441168	0.435626
Kmar	hypoxia	4.34439	0.334172
Kmar	hypoxia	3.01952	0.286678
Kmar	hypoxia	2.82561	0.342103
Kmar	hypoxia	2.87012	0.353656
Kmar	hypoxia	2.93489	0.306965
Kmar	hypoxia	2.60195	0.355904
Kmar	hypoxia	1.6437	0.360807
P_wingeii	normoxia	0.621433	0.466089
P_wingeii	normoxia	0.431219	0.440386
P_wingeii	normoxia	1.74578	0.422535
P_wingeii	normoxia	1.6022	0.375882
P_wingeii	normoxia	0.621707	0.418994
P_wingeii	normoxia	0.416118	0.394217
P_wingeii	normoxia	1.56154	0.40624
P_wingeii	normoxia	0.35037	0.473951
P_wingeii	normoxia	0.447115	0.421855
P_wingeii	normoxia	0.837982	0.391117
P_wingeii	normoxia	0.720739	0.450619
P_wingeii	normoxia	1.35657	0.381892
P_wingeii	normoxia	2.28722	0.425059
P_wingeii	hypoxia	1.38983	0.431561
P_wingeii	hypoxia	2.08106
P_wingeii	hypoxia	1.62852	0.445374
P_wingeii	hypoxia	1.65214	0.393109
P_wingeii	hypoxia	1.40441	0.445468
P_wingeii	hypoxia	1.14776	0.452741
P_wingeii	hypoxia	0.581244	0.427067
P_wingeii	hypoxia	0.574203	0.465307
P_wingeii	hypoxia	0.507939	0.45039
P_wingeii	hypoxia	0.954029	0.468823
P_wingeii	hypoxia	1.6963	0.459681
P_wingeii	hypoxia	1.41487	0.39704
P_wingeii	hypoxia	1.96902	0.406958
P_wingeii	hypoxia	5.22335	0.408514

## Sheet: Figs4C+S1C
Treatment	Normalized_fluorescence	calcification
freshwater	0.683689	0.386933
freshwater	2.69033	0.343506
freshwater	0.540042	0.389112
freshwater	0.824964	0.375327
freshwater	0.844332	0.379122
freshwater	3.29225	0.396167
freshwater	0.203055	0.362631
freshwater	0.652708	0.376275
freshwater	0.178316	0.370007
freshwater	0.28514	0.370613
freshwater	0.322123	0.36843
freshwater	0.149291	0.365649
freshwater	2.33376	0.383155
freshwater	0.921	0.331636
freshwater	1.38907	0.335638
freshwater	1.2655	0.364199
freshwater	2.1456	0.38789
freshwater	0.75181	0.379089
freshwater	0.485225	0.380112
freshwater	0.142649	0.358589
freshwater	0.167966	0.392433
freshwater	0.555614	0.381843
freshwater	0.714592	0.365755
freshwater	1.75393	0.361085
freshwater	2.63228	0.352556
freshwater	0.0747476	0.32871
seawater	0.884344	0.362294
seawater	0.898746	0.383331
seawater	2.02405	0.376922
seawater	1.58341	0.395681
seawater	3.30304	0.374134
seawater	2.33668	0.416307
seawater	0.375543	0.388372
seawater	2.52069	0.366863
seawater	1.32501	0.40383
seawater	1.55651	0.386453
seawater	1.40534	0.38413
seawater	1.57203	0.410474
seawater	1.32585	0.380105
seawater	1.19017	0.354185
seawater	1.16976	0.382042
seawater	1.94723	0.333405
seawater	2.7494	0.31729
seawater	0.294603	0.324806
seawater	1.06631	0.340007
seawater	0.589312	0.336467
seawater	0.515745	0.365556
seawater	0.502071	0.358075
seawater	1.97352	0.37886
seawater	3.93576	0.406768
seawater	0.602531	0.344332
seawater	0.379174	0.352219

## Sheet: Figs4D+S1D
Species	Treatment	Normalized_fluorescence	calcification
Kmar	25°C	1.95063	0.376406
Kmar	25°C	0.76971	0.362771
Kmar	25°C	2.38624	0.364328
Kmar	25°C	1.16169	0.38384
Kmar	25°C	0.853719	0.338201
Kmar	25°C	0.845778	0.387835
Kmar	25°C	0.286718	0.361883
Kmar	25°C	0.728889	0.341748
Kmar	25°C	0.527688	0.384479
Kmar	25°C	0.488927	0.353858
Kmar	30°C	1.59864	0.380894
Kmar	30°C	3.12318	0.397546
Kmar	30°C	5.49977	0.393729
Kmar	30°C	0.713257	0.365949
Kmar	30°C	3.24041	0.346643
Kmar	30°C	0.641939	0.39143
Kmar	30°C	1.18025	0.359079
Kmar	30°C	4.91219	0.368651
Kmar	30°C	1.47789	0.409649
Kmar	30°C	1.28323	0.398047
Kmar	30°C	1.67314	0.349759
Kmar	30°C	3.54169	0.364312
P_wingeii	25°C	1.2345	0.477342
P_wingeii	25°C	1.16552	0.458444
P_wingeii	25°C	0.841624	0.497865
P_wingeii	25°C	0.744957	0.524918
P_wingeii	25°C	0.964133	0.460254
P_wingeii	25°C	1.05531	0.394617
P_wingeii	25°C	1.39249	0.474469
P_wingeii	25°C	0.601459	0.446237
P_wingeii	25°C	0.458682	0.435478
P_wingeii	25°C	1.54132	0.409223
P_wingeii	30°C	0.324686	0.492323
P_wingeii	30°C	1.25794	0.423978
P_wingeii	30°C	0.762146	0.393207
P_wingeii	30°C	0.651802	0.451242
P_wingeii	30°C	0.486583	0.385185
P_wingeii	30°C	1.43718	0.464966
P_wingeii	30°C	1.77724	0.492764
P_wingeii	30°C	0.557035	0.452309
P_wingeii	30°C	0.496279	0.382663
P_wingeii	30°C	0.464435	0.381344

## Sheet: Fig5
trial	rate	treatment	pressure
1	35	Control	3.881
2	35	Control	4.01509
3	35	Control	3.9241
4	35	Control	3.83177
5	35	Control	4.19957
1	35	Decalcified	3.59883
2	35	Decalcified	3.55595
3	35	Decalcified	3.68919
4	35	Decalcified	3.70727
5	35	Decalcified	4.0787
1	80	Control	7.30587
2	80	Control	7.69527
3	80	Control	7.51111
4	80	Control	7.18029
5	80	Control	8.10592
1	80	Decalcified	6.71226
2	80	Decalcified	7.17003
3	80	Decalcified	7.01686
4	80	Decalcified	7.05443
5	80	Decalcified	7.91313
1	115	Control	9.49124
2	115	Control	10.0038
3	115	Control	9.72635
4	115	Control	9.26737
5	115	Control	10.6154
1	115	Decalcified	8.7617
2	115	Decalcified	9.48832
3	115	Decalcified	9.15692
4	115	Decalcified	9.19799
5	115	Decalcified	10.3132
1	150	Control	11.2018
2	150	Control	11.7391
3	150	Control	11.5255
4	150	Control	10.8648
5	150	Control	12.7186
1	150	Decalcified	10.5181
2	150	Decalcified	11.2835
3	150	Decalcified	10.8669
4	150	Decalcified	10.9485
5	150	Decalcified	12.3184
1	185	Control	11.3526
2	185	Control	11.8959
3	185	Control	11.6803
4	185	Control	10.9324
5	185	Control	12.7976
1	185	Decalcified	10.8459
2	185	Decalcified	11.6452
3	185	Decalcified	11.1934
4	185	Decalcified	11.3211
5	185	Decalcified	12.7326
